# How subject-specific biomechanics influences tendon strains in Achilles tendinopathy patients: A finite element study

1 **Alessia Funaro<sup>1\*</sup>, Vickie Shim<sup>2</sup>, Ine Mylle<sup>1</sup>, Benedicte Vanwanseele<sup>1</sup>**

2 <sup>1</sup>Human Movement Biomechanics Research Group, Department of Movement Sciences, KU Leuven,  
3 Leuven, Belgium

4 <sup>2</sup>Auckland Bioengineering Institute, University of Auckland, Auckland, New Zealand

5 **\* Correspondence:**

6 Alessia Funaro

7 [alessia.funaro@kuleuven.be](mailto:alessia.funaro@kuleuven.be)

8 **Keywords: achilles tendon, twisting sub-tendons morphology, subject-specific 3D models,**  
9 **tendon strains, finite element modeling, rehabilitation exercises**

## 10 **Abstract**

11 The treatment of Achilles tendinopathy is challenging, as 40% of patients do not respond to the existing  
12 rehabilitation protocols. These rehabilitation protocols do not consider the individual differences in the  
13 Achilles tendon (AT) characteristics, which are crucial in creating the optimal strain environment that  
14 promotes healing. While previous research suggests an optimal strain for AT regeneration (6% tendon  
15 strains), it is still unclear if the current rehabilitation protocols meet this condition. Consequently, this  
16 study aimed to investigate the influence of a selection of rehabilitation exercises on strains in patients  
17 with Achilles tendinopathy using subject-specific finite element (FE) models of the free AT. Secondly,  
18 the study aimed to explain the influence of muscle forces and material properties on the AT strains.  
19 The 21 FE models of the AT included the following subject-specific features: geometry estimated from  
20 3D freehand ultrasound images, Elastic modulus estimated from the experimental stress-strain curve,  
21 and muscle forces estimated using a combination of 3D motion capture and musculoskeletal modelling.  
22 These models were used to determine tendon strain magnitudes and distribution patterns in the mid-  
23 portion of the AT. The generalized ranking suggested a progression of exercises to gradually increase  
24 the strains in the mid-portion of the AT, starting from the concentric and eccentric exercises and going  
25 to more functional exercises, which impose a higher load on the AT: bilateral heel rise ( $0.031 \pm 0.010$ ),  
26 bilateral heel drop ( $0.034 \pm 0.009$ ), unilateral heel drop ( $0.066 \pm 0.023$ ), walking ( $0.069 \pm 0.020$ ),  
27 unilateral heel drop with flexed knee ( $0.078 \pm 0.023$ ), and bilateral hopping ( $0.115 \pm 0.033$ ). Unilateral  
28 heel drop and walking exercises were not significantly different and they both fell within the optimal  
29 strain range. However, when examining individual strains, it became evident that there was diversity  
30 in exercise rankings among participants, as well as exercises falling within the optimal strain range.  
31 Furthermore, the strains were influenced more by the subject-specific muscle forces compared to the  
32 material properties. Our study demonstrated the importance of tailored rehabilitation protocols that  
33 consider not only individual subject-specific morphological and material characteristics but especially  
34 subject-specific muscle forces. These findings make a significant contribution to shape future  
35 rehabilitation protocols with a foundation in biomechanics.

## 36 **1. Introduction**

37 Achilles tendinopathy is a multifaceted condition (Nicola Maffulli & Kader, 2002) that can profoundly  
38 affect individuals (Visser *et al.*, 2021), including both athletes and those with relatively low levels of  
39 physical activity (Rolf & Movin, 1997). The degenerative changes usually occur in the mid-portion of  
40 the free Achilles tendon (AT) (Maffulli *et al.*, 2004), with pain as the main symptom. For this reason,  
41 the current rehabilitation protocols aim to reduce aggravating loads by introducing pain-relieving loads  
42 (Cook & Purdam, 2014). At present, the rehabilitation protocols tend to include a variety of exercises,  
43 namely: eccentric exercises (Alfredson *et al.*, 1998a), a combination of eccentric and concentric  
44 exercises (Silbernagel *et al.*, 2001) and a combination of more functional exercises (Mascaró *et al.*,  
45 2018). Although the eccentric muscle training is the preferred choice for decreasing pain in chronic  
46 Achilles tendinopathy (Silbernagel *et al.*, 2001), there is still little clinical or mechanistic evidence for  
47 isolating the eccentric component (Malliaras *et al.*, 2013). Previous animal studies have demonstrated  
48 that a certain loading regime (and consequently tendon strains: 6%) promotes tendon remodeling and  
49 the creation of a proper (internal) mechanical environment, and therefore is able to reverse early-stage  
50 pathological changes in Achilles tendinopathy patients (T. Wang *et al.*, 2015). Also in humans, it was  
51 found that a specific threshold of strain magnitude (~5%) must be reached in order to initiate adaptive  
52 changes in both the mechanical and morphological characteristics of the AT (Arampatzis *et al.*, 2007).  
53 However, it remains unknown if current rehabilitation exercises provide this optimal strain dose needed  
54 for tendon adaptation and regeneration. Indeed, Achilles tendinopathy treatment is still challenging and  
55 the failure rate of the classical treatment schemes is still high, with 40% of the patients not responding  
56 to these types of training (Nicola Maffulli *et al.*, 2008).

57 The morphology and material properties of tendinopathic tendons are influenced by changes in the  
58 tissue structure, such as the disruption of collagen fiber structure and arrangement and increased type  
59 III collagen content (De Mos *et al.*, 2007; J. H. C. Wang, 2006). Indeed, previous investigations have  
60 already demonstrated that morphological and material changes are observable in tendinopathic  
61 patients, including increased cross-sectional area (CSA) and reduced stiffness and Young's modulus,  
62 in comparison to healthy counterparts (Arya & Kulig, 2010). In the aforementioned study,  
63 experimental data of tendon force and elongation were used for the estimation of the tendon strain.  
64 However, this experimental measure does not take into account the complex subject-specific geometry  
65 of the AT, which makes it unsuitable for the investigation of the internal tendon strains. The AT is the  
66 junction of three independent tendons arising from the triceps surae muscles (from soleus (SOL) and  
67 gastrocnemius medialis (GM) and lateralis (GL)). Hence, three sub-tendons (SOL, GM and GL,  
68 respectively) are fused together in the AT, following the typical twisting structure to the AT. Shim *et al.*  
69 (2018) demonstrated that the presence of twist enables a more uniform distribution of stress across  
70 the AT, when subjected to differential forces from the triceps surae muscles. Different twisted  
71 morphologies were observed among individuals (Edama *et al.*, 2015), with the least twisted  
72 configuration being predominant (Pełkala *et al.*, 2017). Hence, it is essential to account for this twisted  
73 sub-tendon geometry to better understand the distribution of stress (and strain) within the AT under  
74 load, which will reflect the key morphological features observed in individuals. Moreover, the  
75 differential force exerted by the triceps surae muscles plays a crucial role in the elongations of the sub-  
76 tendons, subsequently the strains in the AT. In individuals with Achilles tendinopathy, there is a  
77 noticeable change in the force distribution strategies employed by the triceps surae muscles during  
78 dynamic tasks (Mylle *et al.*, 2023). Consequently, it becomes pivotal to consider the impact of triceps  
79 surae muscle forces on AT when examining the factors contributing to strain development in patients  
80 with Achilles tendinopathy.

81 Our previous study (Funaro *et al.*, 2022) showed that, finite element (FE) models of the AT can be  
82 used to estimate internal tendon strains during rehabilitation exercises, especially under the influence  
83 of varying tendon geometry and material properties. Yin *et al.* (2021) showed how different AT

84 morphologies experience different stress and strain distributions, implying that the injury risk is  
85 varying between individuals. Moreover, Hansen *et al.* (2017) and Shim *et al.* (2014) pointed out that  
86 the free AT stress is highly dependent on subject-specific tendon geometry. Also each individual  
87 possesses unique material properties (Yin *et al.*, 2021). These combined findings suggest that  
88 personalized geometry and material properties are essential features that should be included in AT FE  
89 models when investigating tendon strains during dynamic exercises, especially in patients with  
90 Achilles tendinopathy. Previous AT FE studies that incorporated subject-specific geometry and  
91 material properties mainly used data from healthy individuals, which do not account for the altered AT  
92 geometry and material properties, typical of Achilles tendinopathy patients. When altered AT material  
93 and geometry in Achilles tendinopathy patients were considered (Shim *et al.*, 2019), the number of  
94 developed FE models was limited (n=8) and did not include the sub-tendon structures. Additionally,  
95 muscle forces boundary conditions were recorded during a maximum voluntary isometric contraction,  
96 and not during dynamic conditions, such as rehabilitation exercises. Devaprakash *et al.* (2022)  
97 demonstrated that estimates of AT strain vary significantly depending on the specific rehabilitation  
98 tasks undertaken. Nevertheless, the strain in the AT was determined in a healthy cohort and using  
99 external measures that did not consider the tendon's geometry or material properties. Consequently,  
100 these external measures are inadequate to describe the internal load on the tendon, which is more suited  
101 for FE analysis. In fact, little is known about the influence that subject-specific muscle forces have on  
102 AT strains, in Achilles tendinopathy patients.

103 The main goal of this study was to evaluate how different rehabilitation exercises affect tendon strains  
104 in individuals with Achilles tendinopathy, with the aim of ranking them according to the average strain  
105 observed in the mid-portion of the AT. Moreover, we aim to get better insights into the individual  
106 differences in tendon strains during different rehabilitation exercises in patients with Achilles  
107 tendinopathy and to explain the influence of muscle forces and material properties on the AT strain.  
108 To do this, we developed subject-specific FE models of 21 Achilles tendinopathy patients, which  
109 includes subject-specific geometry, material properties and muscle forces during commonly used  
110 rehabilitation exercises. Specifically, we included exercises which are part of the eccentric muscle  
111 strength training regimen advocated by Stanish *et al.* (1986), due to its promising outcomes in the  
112 management of Achilles tendinopathy (Niesen-Vertommen *et al.*, 1992). We also included concentric  
113 exercises, as recommended by Silbernagel *et al.* (2001), for comparative analysis with eccentric  
114 exercises. Moreover, we included exercises to compare isolated vs. functional and exercises variation  
115 with differential muscle forces. We hypothesized that the strains are lower in concentric and eccentric  
116 exercises and gradually increase in more functional exercises in patients with Achilles tendinopathy.  
117 We also expect that subject-specific strains are more closely related to the subject-specific muscle  
118 forces than the material properties.

## 119 **2. Materials and Methods**

### 120 **2.1 Participants characteristics**

121 Twenty-one participants with mid-portion Achilles tendinopathy (17 males, 4 females; age:  $49 \pm 13$   
122 years, height:  $178 \pm 8$  cm, weight:  $75 \pm 12$  kg, average  $\pm$  SD) participated in the study. The participants  
123 met the following inclusion criteria: I) history of intermittent episodes of AT pain lasting more than 6  
124 consecutive weeks within the past 5 years; II) more than one episode of tendon pain exacerbation and  
125 remission within the past 5 years; III) palpable focal thickening of the AT in the mid-substance; IV)  
126 pain originating from the AT on palpation of thickened AT; and V) sonographic evidence of  
127 tendinopathy. Individuals with Achilles tendinopathy were excluded from the study if they reported  
128 any of the following: I) history of previous surgery or tears involving the AT; II) systemic diseases

129 affecting collagenous tissue; III) insertional Achilles tendinopathy, calcaneal spurs, plantar fasciitis,  
130 and other conditions affecting the foot and ankle complex. All participants completed the Victorian  
131 Institute of Sport Assessment-Achilles questionnaire (VISA-A) (Craig et al., 2003), which provides an  
132 index of Achilles tendinopathy pain and function (VISA-A score:  $73 \pm 19$ ). The study was approved  
133 by the Ethical Committee UZ/KU Leuven and all relevant ethical guidelines, including provision of a  
134 written informed consent prior to participation in the study, were followed.

## 135 **2.2 Experimental data**

### 136 **2.2.1 Data collection**

137 The data collection was performed on patients with Achilles tendinopathy, after a clinical examination  
138 and before starting the rehabilitation program, so that all participants were evaluated at the same stage.  
139 Upon arrival in the laboratory, the participants were asked to lie prone on an isokinetic dynamometer  
140 (Biodex Medical Systems, Shirley, New York, USA) with their knee and hip fully extended, with a  
141 fixated foot and a neutral ankle angle. The protocol started with a familiarization of the plantarflexion  
142 task and a standardized warm up. Each participant performed two repetitions of a 5s maximum  
143 voluntary isometric contraction (MVC). A rest period of 120 s was allowed between contractions. The  
144 MVC was repeated if the difference between the contractions was  $> 8\%$ . After applying a 150ms  
145 moving average, the contraction with the highest torque on the tendinopathic side was chosen to  
146 determine the target torque (30% and 60% MVC) in the subsequent testing task.

147 During this second task, 3D free-hand ultrasound (3DfUS) images were acquired during resting  
148 condition and isometric contractions at 30% and 60% MVC. A conventional 2D ultrasound machine  
149 with a 40-mm linear transducer (L15-7H40-A5, ArtUs EXT-1H system, UAB Telemed, Vilnius,  
150 Lithuania) was used to record images of the AT. The ultrasound machine was combined with an optical  
151 motion tracking system (V120:Trio tracking system, Optitrack, Corvallis, OR, USA) to generate a 3D  
152 reconstruction of the AT. First, the AT of the participants was scanned during resting condition. These  
153 images were used for the generation of the subject-specific mesh. Then, participants were asked to  
154 practice holding isometric contractions at 30% and 60% MVC until they became familiarized with the  
155 testing procedure. Afterwards, the isometric contractions testing task could start. In total, participants  
156 performed six contractions to reach a torque of 30% and 60% of MVC (three contractions for each  
157 condition, randomized order). Fatigue was monitored by keeping 120 s resting time between  
158 contractions. Pain was monitored by asking the participant to give a pain score, between 1 and 10.  
159 Extra resting time was given if needed. Feedback of the torque was provided using visual feedback  
160 displayed on a monitor in front of the participant.

161 Subsequently, the linear probe was placed longitudinally over the AT to acquire a static ultrasound  
162 image at rest, with the center of the probe aligned with the center of rotation (COR), which is the  
163 inferior tip of the lateral malleolus of the tendinopathic ankle. The distance from the inferior tip of the  
164 US probe to the COR was measured using a tape measure ( $d_1$ ) (Merza et al., 2021). This measure was  
165 used later for the estimation of the moment arm, as described in the following section. The moment  
166 arm was necessary to calculate the force value from the MVC, used for the estimation of the Elastic  
167 modulus.

### 168 **2.2.2 Estimation of subject-specific Elastic modulus**

169 The subject-specific Elastic modulus was estimated using the 3DfUS experimental data. All 3DfUS  
170 images were segmented in the 3D Slicer (Version 4.11.20210226) software. To determine subject-  
171 specific tendon length, two main anatomical landmarks (calcaneal notch and soleus muscle-tendon  
172 junction) were manually located on 2D images of the AT and the tendon length was defined as the

173 point-to-point distance between these two landmarks. Tendon elongation was calculated for both 30%  
174 and 60% MVC, by subtracting tendon lengths in the two contractions from the corresponding resting  
175 length, which was used to calculate the overall tissue strain for each subject by dividing the subject's  
176 tendon elongation by the subject's resting length. Then, the subject-specific tendon force was  
177 calculated by dividing the subject-specific MVC by the subject-specific moment arm of the AT. The  
178 subject-specific moment arm was estimated from 2D images. First, the distance between the skin and  
179 midline of AT ( $d_2$ ), also known as the line of action (Maganaris *et al.*, 1998), was measured. Then, the  
180 difference between  $d_1$  (explained in data collection section) and  $d_2$  represented the AT moment arm  
181 (Merza *et al.*, 2021). Tendon cross-sections were digitized manually from the 3D images at half  
182 distance between the calcaneal notch to the soleus muscle-tendon junction, to estimate the subject-  
183 specific average CSA of the mid-portion of the AT. CSA was estimated at rest, 30% and 60% MVC.  
184 Subject-specific tendon stress was then obtained by dividing the calculated subject-specific tendon  
185 force with the subject-specific CSA of the tendon. Finally, the subject-specific Elastic modulus was  
186 calculated as the slope of the line fitted to the subject-specific stress-strain values at 30% and 60% of  
187 the peak force for each subject. The subject-specific values of the Elastic modulus can be found in the  
188 **Supplementary Material**. The average values and the standard deviations of MVC, CSA at rest and  
189 Elastic modulus among the 21 participants can be found in **Table 1**.

| MVC (Nm) | Moment arm (mm) | CSA (mm <sup>2</sup> ) | Elastic modulus (MPa) |
|----------|-----------------|------------------------|-----------------------|
| 113 ± 32 | 45 ± 5          | 112 ± 31               | 632 ± 201             |

190 **Table 1.** The table shows the average of the subject-specific values for maximum voluntary  
191 contraction (MVC), moment arm, cross-sectional area (CSA) and Elastic modulus.

### 192 2.2.3 Estimation of subject-specific muscle forces

193 The participants came for a second time to the Movement and posture Analysis Laboratory Leuven  
194 (Belgium) to complete five repetitions of six rehabilitation exercises in a randomized order: walking  
195 (walk), bilateral heel rise (birise), bilateral heel drop with extended knee (bidrop), unilateral heel drop  
196 with extended knee (unidrop), unilateral heel drop with flexed knee (unidrop bent) and bilateral  
197 hopping (bihop). In between trials, the participant was given a minimum of 30 s of rest before moving  
198 on to the next trial. An extended Plug-in Gait marker set including 34 retroreflective markers, of which  
199 the trajectories were recorded using ten infrared cameras (Vicon, Oxford Metrics, Oxford, United  
200 Kingdom) at a sampling rate of 150 Hz, were placed on anatomical landmarks to obtain kinematic data.  
201 Ground reaction force data was measured from the participant's affected leg using a force plate  
202 embedded in the walkway. A modified generic musculoskeletal model (OpenSim gait2392 model)  
203 (Delp *et al.*, 1990) with six degrees of freedom and 43 Hill-type muscle-tendon actuators per leg was  
204 scaled in OpenSim 3.3 (OpenSim, Stanford, CA, United States) and joint kinematics were then  
205 computed using a Kalman Smoothing algorithm (F. De Groote *et al.*, 2008). Next, an inverse dynamic  
206 approach was used to calculate the joint moments. The forces of the three triceps surae muscles (SOL,  
207 GM, and GL muscle forces) were then estimated using a dynamic optimization method by minimizing  
208 the sum of squared muscle activations (Friedl De Groote *et al.*, 2016). The subject-specific muscle  
209 forces at the time of peak total muscle force during each exercise were used as boundary conditions in  
210 the subject-specific FE models. The subject-specific values of the muscle forces can be found in the  
211 **Supplementary Material**.

### 212 2.3 Generation of FE models

### 213 2.3.1 Development of the three types of AT FE models

214 For each participant, three FE models of the AT were developed. The first model, which we call  
215 “*subject-specific model*”, was developed with subject-specific geometry, material properties and  
216 muscles forces to determine the individual ranking of the exercises based on AT strains. Subsequently,  
217 to investigate the impact that subject-specific material properties and muscle forces have on AT strains,  
218 two additional models were developed. The first model, called “*material model*”, had subject-specific  
219 Elastic modulus and generic muscle forces. The other model, called “*muscle forces model*”, had  
220 subject-specific muscle forces and generic material properties. The generic muscle forces were  
221 estimated as average of the subject-specific muscle forces, for each exercise (**Table 2**), among all the  
222 participants. The generic Elastic modulus was estimated as the average of the subject-specific Elastic  
223 moduli (**Table 1**), among all the participants. All the models had subject-specific geometry. A  
224 summary of the characteristics of the three models is presented in **Figure 1**.

|                     | SOL force (N)  | GM force (N)  | GL force (N)  |
|---------------------|----------------|---------------|---------------|
| <b>BiRise</b>       | 827.6 ± 184.4  | 205.5 ± 37.9  | 91.0 ± 18.5   |
| <b>BiDrop</b>       | 847.7 ± 178.6  | 246.6 ± 71.7  | 117.6 ± 28.8  |
| <b>UniDrop</b>      | 1852.7 ± 671.3 | 439.7 ± 119.4 | 149.7 ± 35.2  |
| <b>Walk</b>         | 1603.6 ± 402.8 | 627.4 ± 219.9 | 187.7 ± 63.4  |
| <b>UniDrop Bent</b> | 2324.4 ± 636.9 | 430.1 ± 141.2 | 145.5 ± 80.6  |
| <b>BiHop</b>        | 3565.2 ± 680.8 | 416.6 ± 270.5 | 82.02 ± 100.5 |

225 **Table 2.** The table presents the generic muscle force values for six rehabilitation exercises, used as  
226 boundary conditions for loading the three sub-tendons (SOL, GM, and GL) of the FE models. These  
227 generic muscle forces were determined by averaging subject-specific muscle forces from the triceps  
228 surae muscles across 21 participants, across the six rehabilitation exercises (in the table: mean ± SD,  
229 measured in Newton (N)).

### 230 2.3.2 Generic model geometry

231 A first generic template mesh was developed, to allow the consistent definition of the three sub-tendons  
232 within subject-specific FE models. This mesh was generated from an initial geometry, obtained by  
233 segmentation of images from one healthy male subject (age = 22 years, weight = 64 kg, height = 180  
234 cm) recorded by 3DfUS images, defining the outer geometry of the tendon. In this study, only the least  
235 twisting geometry described by Pękala *et al.* (2017) was created, since the ranking of the rehabilitation  
236 exercises is not influenced by the twist of the sub-tendons (Funaro *et al.*, 2022). This mesh was  
237 developed using Materialise 3-matic (Materialise NV, Leuven, Belgium). The tendon model was  
238 divided into three sub-tendons and the twisting structure was defined. The sub-tendons geometries  
239 were meshed into 8-nodes hexahedral solid elements. A mesh convergence study was performed to  
240 refine the mesh until the Principal Effective Lagrange strains reached an asymptote.

### 241 2.3.3 Constitutive models

242 The geometry was represented as an incompressible, transversely isotropic hyperelastic material  
243 (Weiss *et al.*, 1996), which we already used in our previous study (Funaro *et al.*, 2022). The uncoupled  
244 strain energy function can be written as follows:

$$245 \quad \Psi = F_1(\tilde{I}_1, \tilde{I}_2) + F_2(\tilde{\lambda}) + \frac{K}{2} [\ln(J)]^2$$

246 Here,  $\tilde{I}_1$  and  $\tilde{I}_2$  are the first and second invariants of the deviatoric version of the right Cauchy-Green  
247 deformation tensor.  $\tilde{\lambda}$  is the deviatoric part of the stretch along the fiber direction, and  $J = \det(F)$  is  
248 the Jacobian of the deformation. This strain energy density function consists of two parts:  $F_1$  represents  
249 the material response of the isotropic ground substance matrix, while  $F_2$  represents the contribution  
250 from the collagen fibers.  $F_1$  was described as a Neo-Hookean model and it was equal to  $\frac{C_1(I_1-3)}{2}$ . The  
251 resulting fiber stress from the fibers was expressed using the following piecewise function:  
252

$$253 \quad \tilde{\lambda} \frac{\partial F_2}{\partial \tilde{\lambda}} = \begin{cases} \mathbf{0} & \tilde{\lambda} \leq 1 \\ C_3(e^{C_4(\tilde{\lambda}-1)} - 1) & 1 < \tilde{\lambda} < \lambda_m \\ C_5\tilde{\lambda} + C_6 & \tilde{\lambda} \geq \lambda_m \end{cases}$$

254  
255 Here,  $\lambda_m$  is the stretch at which the fibers are straightened,  $C_3$  is the scaling of the exponential stress,  
256  $C_4$  is the rate of the uncrimping of the fibers and  $C_5$  is the Young's modulus of the straightened fibers.  
257  $C_6$  is determined from the requirement that the stress is continuous at  $\lambda_m$ . For the *subject-specific model*  
258 and *material model*, each participant had a different  $C_5$  value, calculated using the subject-specific  
259 stress-strain curve as described above. For *muscle forces model*,  $C_5$  value was the average of the  
260 subject-specific Elastic moduli (**Table 1**). The values of the other material properties were not subject-  
261 specific and they were obtained from Shim *et al.* (2019), involving tendinopathic tendons. The  
262 constitutive models implemented in FEBio Studio (Maas *et al.*, 2012) as “*trans iso Mooney-Rivlin*”  
263 were used in this study. The sub-tendons fascicles were modelled using the FEBio's local fiber  
264 direction function ( $a_0$ ) (Maas *et al.*, 2012), which was defined for each element to represent the tendon  
265 fascicle structure (Knaus & Blemker, 2021). For each sub-tendon, fibers were directed from the  
266 proximal cross-section to the distal cross-section. In this way, the resulted local fibers could follow the  
267 twisting structure of the sub-tendons.

### 268 2.3.4 Creation of FE models with subject-specific geometry with free-form deformation

269 Subject-specific FE models were generated using the subject-specific geometry. First, the 2D  
270 ultrasound images of the tendon during resting conditions were transformed into the global coordinate  
271 system using the 3D Slicer software to create a reconstructed 3D volume. After computing a 3D volume  
272 reconstruction, the AT was manually outlined using the reconstructed 2D images, and the  
273 corresponding borders were combined to generate 3D data clouds that captures tendon geometry. In  
274 total, 21 subject-specific 3D shapes were obtained. Subsequently, the template mesh containing three  
275 sub-tendons was customized to each subject-specific geometry obtained with the subject's 3DfUS  
276 image. The free-form deformation method (Fernandez *et al.*, 2018) was used, which morphs an  
277 underlying mesh by embedding it inside a host mesh. The external and internal nodes of a given mesh  
278 are deformed with the same transformation, to match the subject's geometry. In this way, it was  
279 possible to obtain subject-specific free AT geometries for each participant, representing the least  
280 twisting structure described in the literature (Pełkala *et al.*, 2017).

### 281        **2.3.5 FE models boundary conditions**

282        The models boundary conditions were defined in FEBio (Maas et al., 2012). The contact between the  
283        three sub-tendons was defined as frictionless sliding (Knaus & Blemker, 2021). The distal end of the  
284        tendon models was fixed to mimic the attachment of the tendon to the calcaneus. The muscle forces  
285        for the different rehabilitation exercises were applied as nodal loads to the proximal faces of each sub-  
286        tendon. The nodal displacements were constrained to move only in the distal-proximal direction to  
287        mimic the constraints provided by paratenon and fascia cruris that hold the sub-tendons together (Diniz  
288        et al., 2022).

### 289        **2.4 Internal tissue strain analysis**

290        Analyses were conducted to quantitatively examine strain distribution patterns during various exercises  
291        in the FE models. The average of the maximum principal strain in the mid-portion (defined as the  
292        middle third of the AT models) of the *subject-specific models* was analysed to rank the rehabilitation  
293        exercises for the Achilles tendinopathy patients (**Figure 2**). The ranking of the exercises is based on  
294        the mean of the average strains among all the participants. An optimal strain range was used between  
295        5% and 7% tendon strain based on the findings of Wang *et al.* (2015) while allowing for a margin of  
296        error of up to 1% strain. Secondly, we investigated the distribution of the maximum principal strain  
297        and identified the location and magnitude of the peak maximum principal strain across the *subject-*  
298        *specific models*. This was done to characterize the overall strain patterns associated with different  
299        exercises (**Figure 2**). The average and peak of the maximum principal strain in the mid-portion of the  
300        *material models* and *muscle forces models* were analysed for subsequent regression analysis.

### 301        **2.5 Statistical analysis**

302        Statistical analysis for the strains in the mid-portion of the AT models was performed using SPSS  
303        Statistics software (IBM Corp. (2017). IBM SPSS Statistics for Windows (Version 29.0.1.0). Armonk,  
304        NY: IBM Corp). A repeated measures ANOVA was performed to compare the means of the average  
305        and peak strains in the mid-portion of the *subject-specific models* across the exercises. If a significant  
306        main effect was found, the LSD (Least Significant Difference) for post-hoc testing was applied to  
307        identify the exercises whose means are statistically different. All data are presented as mean  $\pm$  SD.  
308        Statistical level of significance was set as  $p < 0.05$ . In the subsequent analysis, linear regression was  
309        conducted to assess the impact of subject-specific material properties and subject-specific muscle  
310        forces on the average and peak strains in the mid-portion of the AT FE models. For significant  
311        correlations, the coefficient of correlation (R) between *subject-specific model* and *material model*, and  
312        then between *subject-specific model* and *muscle forces model*, was compared.



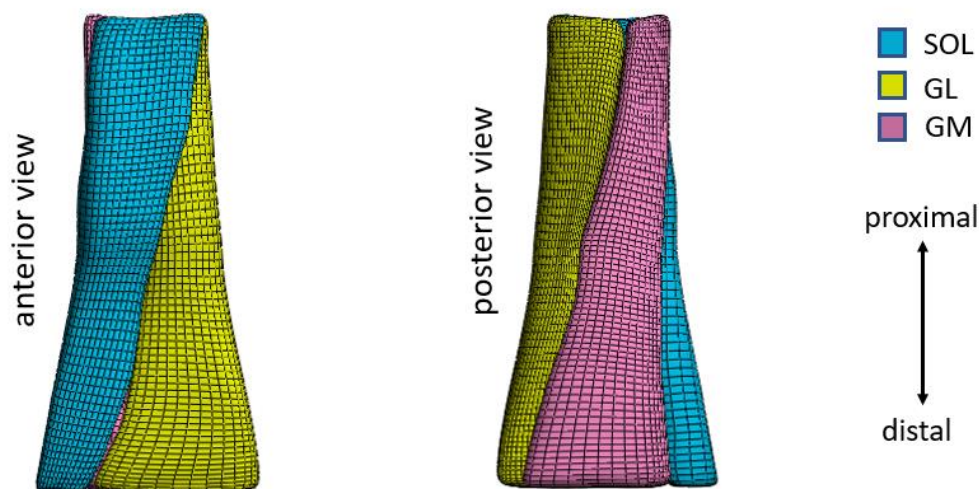

|                 | Subject-specific model | Material model   | Muscle forces model |
|-----------------|------------------------|------------------|---------------------|
| Geometry        | subject-specific       | subject-specific | subject-specific    |
| Elastic modulus | subject-specific       | subject-specific | average             |
| Muscle forces   | subject-specific       | average          | subject-specific    |

313

314 **Figure 1.** On the top, anterior and posterior view of an example of Achilles free tendon geometry,  
 315 representing the least twisted geometry described by Pekala et al. (2017). The 3D tendon models were  
 316 divided in three sub-tendons, each one arising from one of the three triceps surae muscles: the soleus  
 317 (SOL) and the two heads (medialis, GM and lateralis, GL) of the gastrocnemius muscle. On the bottom,  
 318 a summary of the characteristics of the three different models.

### 319 3. Results

#### 320 3.1 Subject-specific models

##### 321 3.1.1 Ranking of the Rehabilitation Exercises Based on Tendon Strains

322 Starting from the lowest average strain in the mid-portion of the *subject-specific models*, the  
 323 generalized ranking of rehabilitation exercises was: birise ( $0.031 \pm 0.010$ ), bidrop ( $0.034 \pm 0.009$ ),  
 324 unidrop ( $0.066 \pm 0.023$ ), walk ( $0.069 \pm 0.020$ ), unidrop bent ( $0.078 \pm 0.023$ ), and bihop ( $0.115 \pm 0.033$ ).  
 325 All exercises demonstrated statistically significant differences from one another, except for unidrop  
 326 and walk, as depicted in **Figure 2**. Notably, at peak total muscle force, only unidrop and walk showed  
 327 average strains within the range of the reported optimal strain, when the generalized ranking was  
 328 evaluated. However, when evaluated on an individual level, the variations in average strain across  
 329 patients become more evident not only in the exercise rankings but also in the exercises that fall within  
 330 the optimal strain range. This indicates that participants achieved optimal strain levels during different  
 331 exercises. While the majority of participants reached optimal strain levels during the unidrop and walk  
 332 exercises (eight and twelve participants, respectively), individual rankings revealed that the optimal  
 333 strain range could also be attained during the unidrop bent exercise for seven participants, bihop for  
 334 two participants, birise for one participant, and bidrop for one participant as well (**Figure 2**).

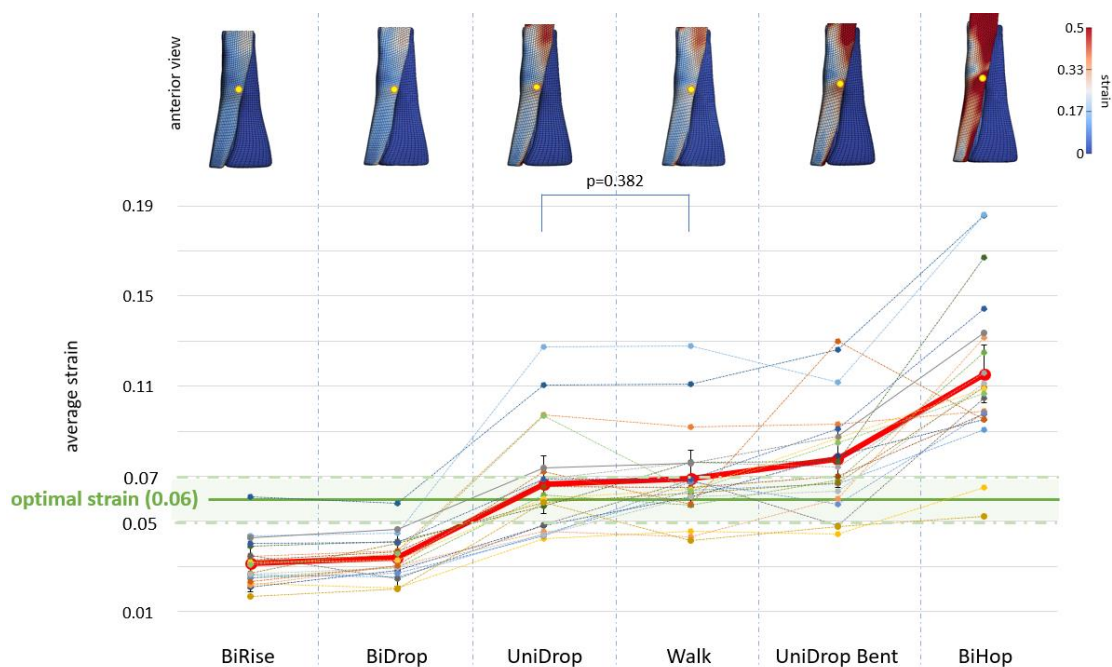

335 **Figure 2.** On the top, a representative example of the distribution of the maximum principal strain for  
 336 each exercise, from one participant. The yellow dots indicate the location of the peak strain. On the  
 337 bottom, the red line represents the mean of the average strain during each exercise, in the mid-portion  
 338 of the *subject-specific models*. Exercises are ranked based on this average strain. The dotted lines  
 339 represent the average strain during the exercises for each participant, in the mid-portion of the *subject-*  
 340 *specific models*. The optimal strain, designated as 0.06 (6%) according to Wang et al. (2015), is  
 341 represented by the green bar, which highlights the range defined as  $0.06 \pm 0.01$  ( $6 \pm 1\%$ ) strain. All  
 342 exercises showed statistically significant differences except for unidrop and walk. Significance was set  
 343 at  $p < 0.05$ .

### 344 3.1.2 Strain distribution, peak location and peak strain values

345 The peak strain consistently occurred in the middle of the mid-portion or upper mid-portion of the SOL  
 346 sub-tendon, which is the sub-tendon exposed to the highest muscle forces (**Table 2**). However, there  
 347 was marked variability in the exact location of the peak strain and strain distribution among patients,  
 348 as illustrated in **Figure 3**. Conversely, within a patient, both the peak location and strain distribution  
 349 remained consistent throughout the exercises (as shown in **Figure 2**). Nevertheless, the magnitude of

350 peak strain varied depending on the load applied during each exercise. The peak strain values in the  
351 mid-portion of the subject-specific models were: birise,  $0.194 \pm 0.081$ ; bidrop,  $0.196 \pm 0.069$ ; unidrop,  
352  $0.481 \pm 0.299$ ; walk,  $0.403 \pm 0.209$ ; unidrop bent,  $0.648 \pm 0.389$ ; bihop,  $0.963 \pm 0.462$ . All exercises  
353 exhibited significant differences ( $p < 0.05$ ) from each other, except for birise and bidrop ( $p=0.774$ ),  
354 and walk and unidrop ( $p = 0.061$ ).

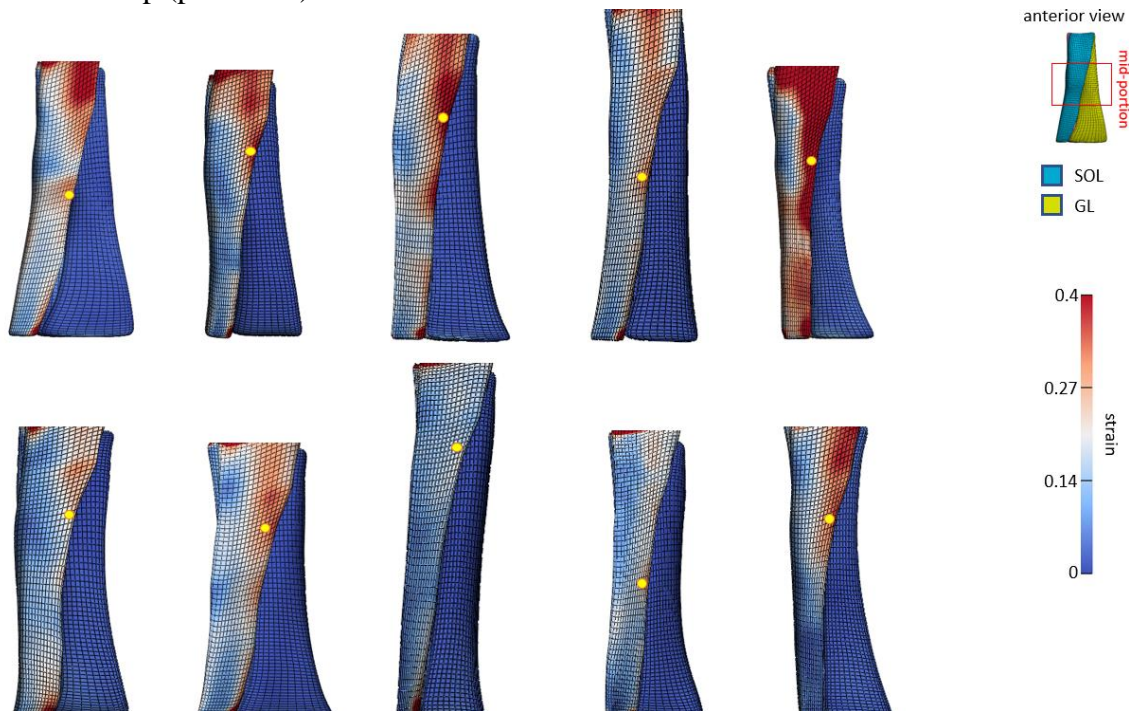

355 **Figure 3.** Representative examples of the distribution of maximum principal strain for ten participants  
356 during walking. The anterior view of the subject-specific models is presented, highlighting the SOL  
357 sub-tendon with the highest strains. The yellow dots indicate peak strains, predominantly situated in  
358 the middle and the upper part of the mid-portion of the SOL sub-tendon. The mid-portion refers to the  
359 middle third of the model, as shown in the example in the top right of the figure. Location of the peak  
360 strain is determined over the whole free tendon, ignoring strains in the regions where boundary  
361 conditions were applied, in accordance with Saint-Venant's principle.

## 362 3.2 Material models and Muscle forces models

### 363 3.2.1 Regression analysis

364 Scatterplots depicting the average and peak of the maximum principal strain in the mid-portion of the  
365 AT models for the *material models* and the *muscle forces models* were presented in **Figure 4**. The  
366 association between the *subject-specific model* and the *material model* yielded a lower R than the  
367 association between the *subject-specific model* and *muscle forces model*. The higher similarity in strain  
368 magnitude between the *muscle forces model* and the *subject-specific model* (as observable in **Figure**  
369 **5**) indicates that the influence of subject-specific Elastic modulus has a lesser impact on the strains of  
370 the *subject-specific model* compared to the influence of muscle forces.

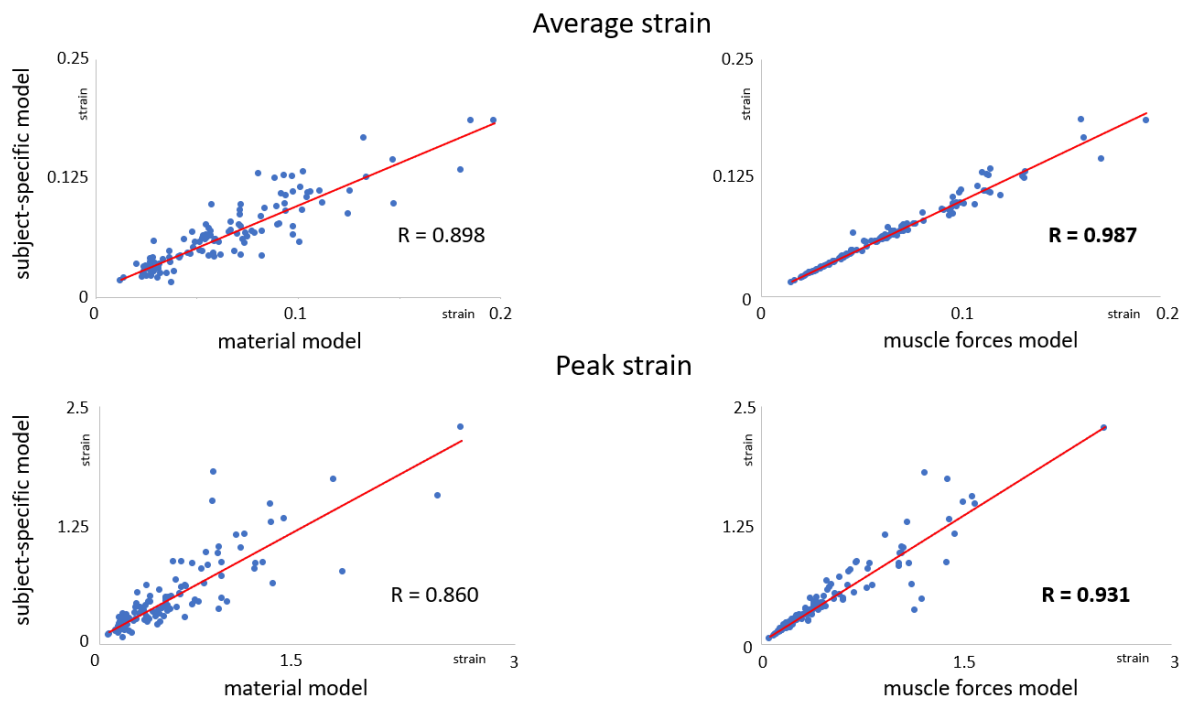

371

372 **Figure 4.** Scatterplots and linear regression lines of comparisons of subject-specific model with  
373 material model and muscle forces model, for the average (on the top) and peak (on the bottom) strains  
374 in the mid-portion of the AT models. The coefficient of correlation (R) computed across all the  
375 participants and exercises is also displayed in each plot.

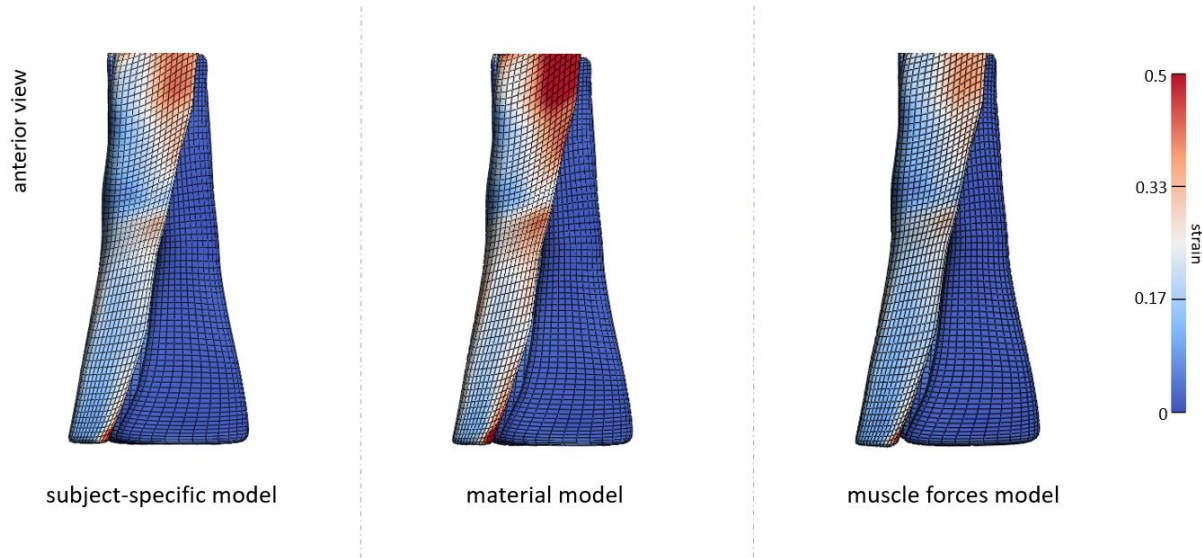

376

377 **Figure 5.** Representative examples of the strain distribution for the three types of AT models developed:  
378 subject-specific model, material model and muscle forces model. The example is presented for one  
379 participant, during the simulation of walking. While the strain distribution and peak strain location  
380 remain constant among models, the image evidences the high correlation of the strain magnitude  
381 between the subject-specific model and the muscle forces model, as demonstrated by the high R value.

382

## 383 4. Discussion

384 The primary objective of this research was to assess the tendon strains during various rehabilitation  
385 exercises in patients with Achilles tendinopathy, aiming to rank the exercises based on average strain  
386 in the mid-portion of the AT. Critical in the estimation of patient-specific strains is the application of  
387 FE models incorporating subject-specific geometry, material properties, and muscle forces. This study  
388 successfully determined a ranking of the rehabilitation exercises aimed at gradually increasing the  
389 strains in the mid-portion of the AT. The recommended progression begins with concentric and  
390 eccentric exercises, such as bilateral heel rise, bilateral heel drop and unilateral heel drop, and advances  
391 to more functional exercises like walking, unilateral heel drop with flexed knee and bilateral hopping.  
392 Both unilateral heel drop and walking exercises demonstrated no significant difference and fell within  
393 the optimal strain range. However, when analyzing individual strains, there was variability in exercise  
394 rankings among participants, as well as exercises falling within the optimal strain range. Lastly,  
395 variability between participants in strains were more closely related to the subject-specific muscle  
396 forces rather than the material properties.

### 397 4.1 Ranking of the Rehabilitation Exercises Based on Tendon Strains

398 In accordance with our hypothesis, the resultant generalized ranking delineated a sequence of  
399 rehabilitation exercises to gradually increase tendon strains, starting with the relatively low-load  
400 concentric bilateral heel rise, and progressing towards the eccentric bilateral heel drop. While  
401 Alfredson *et al.* (1998) recommended to incorporate the unilateral heel drop exercise during the initial  
402 phase, Silbernagel *et al.* (2001) suggested it be introduced in a later stage of the rehabilitation program,  
403 due to concerns about tendon overload. Our results demonstrate that the unilateral heel drop induced  
404 higher strains in the AT compared to the two bilateral exercises. However, this increased load caused  
405 by the unilateral heel drop achieves optimal strain levels (T. Wang *et al.*, 2015) which suggests that it  
406 can already be used in the initial phase of the rehabilitation program. Similar to other studies  
407 (Devaprakash *et al.*, 2022; Franz *et al.*, 2015), we confirmed that also walking falls within the optimal  
408 strain range necessary for AT tissue healing, despite the fact that walking exposes the AT to a load  
409 approximately four times body weight (Komi *et al.*, 1992). This suggests that individuals with Achilles  
410 tendinopathy may safely engage in walking activities as part of their rehabilitation program from the  
411 beginning, without significant disruption to their daily routines.

412 In adherence to the Alfredson's protocol (Alfredson *et al.*, 1998b), we also incorporated the unilateral  
413 heel drop with flexed knee exercise. This exercise plays a pivotal role in the rehabilitation program by  
414 enhancing the activation of the soleus muscle and facilitating a redistribution of muscle forces.  
415 However, the increased activation of the soleus led to increased strains, which surpassed the optimal  
416 range. It is known that the AT experiences high loads during hopping, equivalent to approximately five  
417 times body weight (Komi *et al.*, 1992). Indeed, our simulation of hopping exercises reflected these high  
418 loads, resulting in strains surpassing the optimal threshold. Nevertheless, our calculations of tendon  
419 strains during hopping surpassed those documented in earlier research. For example, Lichtwark *et al.*  
420 (2005) noted peak strains of 8.3% during unilateral hopping, with tendon strains measured at the  
421 gastrocnemius medialis myotendinous junction level. The probable explanation for this discrepancies  
422 lies in the fact that our strain assessments were based on the free AT, which undergoes notably greater  
423 longitudinal strain compared to the aponeurosis (Farris *et al.*, 2013; Obst *et al.*, 2016). Moreover, the  
424 strains that we reported are from computational models, where the strains are measured at the element  
425 levels. This includes some localised peak strains that are not captured by global strains measured in  
426 above mentioned studies. This might have also caused the higher strains that we observed in our study.

427 Our simulations were based on FE models developed from patients at the beginning of their  
428 rehabilitation program. Considering the likelihood of morphological and material properties alterations  
429 throughout the rehabilitation process, it becomes pertinent to explore how these modifications could  
430 impact AT strains. This analysis could inform the right timing of activities such as unilateral heel drop  
431 with flexed knee and hopping within the rehabilitation program. For instance, Silbernagel *et al.* (2015)  
432 have suggested incorporating such activities in a later stage with the return-to-sport program. By  
433 evaluating the rehabilitation stages and monitoring strain variations together with morphological and  
434 material properties changes, we can ensure that Achilles tendinopathy patients undergo a phased and  
435 carefully managed recovery process by appropriate loading of the AT.

436 The unique characteristics in the subject-specific responses were evident when inspecting the tendon  
437 strains for the individual Achilles tendinopathy patients. Based on our results, it becomes clear that a  
438 generic approach is insufficient since variations in tendon strains among participants for a specific  
439 rehabilitation exercise become visible. While unilateral heel drop and walking were the most common  
440 exercises among participants (eight and twelve participants, respectively), optimal strains were  
441 observed in seven participants during unilateral heel drop with a flexed knee, supporting the theory of  
442 eccentric exercises as the preferred treatment for Achilles tendinopathy patients (Alfredson *et al.*,  
443 1998b). Interestingly, bilateral heel rise and bilateral heel drop exercises consistently resulted in  
444 suboptimal strain levels across individual rankings, with only one participant achieving the optimal  
445 strain for both exercises. Further exploration of these cases could provide further insights in what  
446 characteristics determine these individual tendon strains.

447 Notably, the participant who achieved optimal strain during bilateral heel rise and bilateral heel drop  
448 exhibited an Elastic modulus comparable to the average (709.1 vs. 631.9 MPa, individual and average  
449 Elastic modulus, respectively), suggesting that material properties alone may not be decisive in this  
450 case. Indeed, anthropometric analysis revealed that this participant had a higher weight compared to  
451 the average (80 vs 76 kg, individual and average weight, respectively), and also larger muscle forces  
452 during the execution of these exercises. Furthermore, analysis of AT morphology highlighted a  
453 significantly smaller CSA (the smallest CSA, more specifically) in the mid-portion of the AT model  
454 among the participants (66.4 vs 112.3 mm<sup>2</sup>, individual and average CSA, respectively). The  
455 combination of these factors led to greater strains during the performance of two generally low-load  
456 exercises and so the achievement of the optimal strains earlier during the progression of the  
457 rehabilitation exercises. Therefore, the necessity of personalized exercises prescription tailored to  
458 individual muscle forces and tendon morphology becomes evident, since the strains seem to be highly  
459 dependent.

460 The bilateral hopping was the exercise imposing the highest load on the AT for all participants and, for  
461 this reason, generally located at the end of the rehabilitation exercises progression, given the high  
462 strains produced. Nevertheless, for two participants, this exercise led to optimal strains. Again,  
463 individual characteristics such as material and morphological properties of the AT, and muscle forces  
464 offer insights into this variation. Indeed, one of these two participants exhibited a similar Elastic  
465 modulus and CSA compared to another participant (498.2 vs 478.5 MPa and 111.8 vs 99.8 mm<sup>2</sup>, Elastic  
466 modulus and CSA for the first and the second participant, respectively). However, while one of the  
467 participants only reached the optimal strain level later in the exercise progression, during bilateral  
468 hopping, the other achieved it during walking, demonstrating consistently higher strains compared to  
469 the former. The answer to the question “where is this difference coming from?” can be found in the  
470 force production: the second participant generated higher strains due to greater muscle forces. This  
471 closer analysis also demonstrated that when evaluating strains, it's crucial to consider all subject-

472 specific characteristics. In this case, neglecting subject-specific muscle forces could have introduced  
473 errors into the analysis.

474 These two examples highlight the significant sensitivity of the AT strains to the individual muscle  
475 forces and geometry of each subject. This sensitivity is further supported by the findings of the  
476 regression analysis. According to our hypothesis, our investigation established that the strains were  
477 closer related to the subject-specific muscle forces rather than the material properties. In line with  
478 previous results (Hansen et al., 2017; Shim et al., 2019), it becomes evident that when creating subject-  
479 specific models, prioritizing not only subject-specific geometry but also subject-specific muscle forces  
480 over material properties, is crucial for a more accurate representation of the AT strains, especially when  
481 considering Achilles tendinopathy patients. Mylle *et al.* (2023) demonstrated a different force  
482 distribution strategy between Achilles tendinopathy patients and healthy controls. This altered strategy  
483 at the level of the triceps surae muscles determines altered force transmission to the AT, influencing  
484 the AT loading and, consequently, the AT strains. These outcomes underscore the complex nature of  
485 individual AT responses to load, emphasizing the importance of tailoring rehabilitation protocols to  
486 subject-specific characteristics, especially geometry and muscle forces. Despite that, the definition of  
487 an average ranking of rehabilitation exercises contributes to a general understanding of the diverse  
488 effects these exercises have on AT strains at a population level.

#### 489 **4.2 Strain distribution, peak location and peak strain values**

490 Using subject-specific FE models for a large patient population demonstrated that strain distribution  
491 and peak strain location are influenced more by geometry than muscle forces. Regardless the type of  
492 exercise, the peak strain was consistently observed in the middle or upper mid-portion of the SOL sub-  
493 tendon, which is the most loaded sub-tendon. This aligns with findings indicating that tendinopathic  
494 tendons exhibit non-uniform tendon longitudinal morphology strain along their length under load, with  
495 the mid-portion undergoing larger strains (Nuri et al., 2018). Furthermore, the mid-portion is the  
496 location of the most pronounced pathological changes in tendon structure and composition in Achilles  
497 tendinopathy patients. Consequently, these changes in tendon thickness, fiber alignment, and collagen  
498 distribution can influence the mechanical behaviour of the tendon. The location of the peak strain in  
499 the mid-portion can also be explained by the fact that the least twisted geometry (corresponding to  
500 Type I twist described by Pękala et al. (2017)) was represented in this study. We decided to develop  
501 only this twisting geometry because it is the most common among individuals (Pękala et al., 2017) and,  
502 in our previous study, we demonstrated that the average strain in the mid-portion of the AT is not  
503 affected by the type of twist (Funaro et al., 2022). However, the twist influences the location of the  
504 peak strain, with Type I exhibiting the highest strain in the mid-portion of the tendon, for some  
505 exercises. Despite the peak strain consistently occurred in the mid-portion of the AT models, there was  
506 significant variability in the exact location of the peak among patients, as illustrated in **Figure 3**. These  
507 variations could be influenced by various factors, including the location of the swelling caused by  
508 tendinopathy or other attributes of the tendon's geometry, including its shape, width, and length.  
509 Understanding this information could aid in predicting the likelihood of experiencing the highest strain  
510 in specific areas of the tendon for individuals with Achilles tendinopathy. This insight may also  
511 contribute to strategies for preventing or treating the condition. Therefore, additional research is  
512 necessary.

#### 513 **4.3 Limitations**

514 There are some limitations of this study. The frictional contact between sub-tendons to account for the  
515 compromised sliding mechanism, which leads to more uniform deformations in the AT of Achilles

516 tendinopathy patients (Couppé et al., 2020), was not used in our current FE model. It was not deemed  
517 essential to incorporate this feature into our current model to address our research questions. However,  
518 future development of FE models of Achilles tendinopathy patients will necessitate the incorporation  
519 of subject-specific frictional contact, to also take into account the alterations in non-uniform  
520 deformation within sub-tendons for estimation of the AT strains. In general, positive AT adaptation is  
521 not only dependent on strain magnitude but also time- and rate-dependent (Passini et al., 2021; T.  
522 Wang et al., 2015). However, the loading rate is a factor not accounted for in our model, given the  
523 decision to use a hyperelastic material as a constitutive model for the AT. The choice of hyperelastic  
524 material aligns with common practices in FE models of the AT (Handsfield et al., 2017; Hansen et al.,  
525 2017; Knaus & Blemker, 2021; Shim et al., 2019), assuming that tendons are in a ‘preconditioned  
526 state’ (Weiss *et al.*, 1996). Given the application of load for a specific time point (time of peak total  
527 muscle force) during the execution of the exercise, the incorporation of a viscoelastic material was  
528 considered non-crucial. Subsequent development of FE AT models could explore the integration of  
529 viscoelastic material properties to assess the impact of loading rate on AT strains. Finally, while our  
530 study focused on tensile loads and the tensile strains of the AT, it is important to note that the mid-  
531 portion of the AT may also experience compressive loads (Pringels et al., 2022). However, as the  
532 rehabilitation exercises primarily involve tensile loading, we believed that it was reasonable to neglect  
533 the compressive load component in our current analysis. Further investigations with FE AT models  
534 could investigate compressive loads to provide a comprehensive understanding of AT strains during  
535 rehabilitation exercises.

#### 536 **4.4 Conclusions**

537 In conclusion, we provided a ranking of various rehabilitation exercises in patients with Achilles  
538 tendinopathy based on the average strain in the mid-portion of the AT models. The analysis of  
539 individual rankings revealed noticeable variations in strain distribution patterns among participants.  
540 This finding points out the importance of tailored rehabilitation protocols which consider individual  
541 patient-specific morphological and material characteristics, and muscle forces. Furthermore, subject-  
542 specific FE models proved to be a valuable tool to explain the relationship between rehabilitation  
543 exercises and tendon strains. Our study highlights the significance of prioritizing not only subject-  
544 specific geometry but also subject-specific muscle forces when creating FE models aimed at the  
545 estimation of the AT strain in Achilles tendinopathy patients. The outcomes of this research present an  
546 important contribution to the future development of biomechanically informed rehabilitation protocols.

#### 547 **5. Ethics statement**

548 The studies involving human participants were reviewed and approved by KU/UZ Leuven. The  
549 patients/participants provided their written informed consent to participate in this study.

#### 550 **6. Conflict of Interest**

551 *The authors declare that the research was conducted in the absence of any commercial or financial*  
552 *relationships that could be construed as a potential conflict of interest.*

#### 553 **7. Author Contributions**

554 AF, VS, and BV contributed to conception and design of the study. AF performed volume  
555 reconstruction and segmentation, developed the model geometries, performed the free-form  
556 deformation, FE modelling and analysis, and statistical analysis. AF wrote the first draft of the



557 manuscript. IM performed muscle force estimation. All authors contributed to manuscript revision,  
558 read, and approved the submitted version.

## 559 **8. Funding**

560 Grant No: C24M/20/053, Research Council KU Leuven.

## 561 **9. Acknowledgments**

562 The authors would like to thank the Research Council KU Leuven for providing financial support to  
563 this project.

## 564 **9. Data Availability Statement**

565 The data that support the findings of this study are available from the corresponding author 495 upon  
566 reasonable request.

## 567 **10. Supplementary material**

568 The Supplementary Material for this article can be found as additional tables attached to the  
569 submission.

## 570 **11. References**

571 Alfredson, H., Pietilä, T., Jonsson, P., & Lorentzon, R. (1998a). Heavy-load eccentric calf muscle  
572 training for the treatment of chronic achilles tendinosis. *American Journal of Sports Medicine*,  
573 26(3), 360–366. <https://doi.org/10.1177/03635465980260030301>

574 Alfredson, H., Pietilä, T., Jonsson, P., & Lorentzon, R. (1998b). Heavy-Load Eccentric Calf Muscle  
575 Training For the Treatment of Chronic Achilles Tendinosis. *The American Journal of Sports*  
576 *Medicine*, 26(3), 360–366. <https://doi.org/10.1177/03635465980260030301>

577 Arampatzis, A., Karamanidis, K., & Albracht, K. (2007). Adaptational responses of the human  
578 Achilles tendon by modulation of the applied cyclic strain magnitude. *Journal of Experimental*  
579 *Biology*, 210(15), 2743–2753. <https://doi.org/10.1242/jeb.003814>

580 Arya, S., & Kulig, K. (2010). Tendinopathy alters mechanical and material properties of the Achilles  
581 tendon. *Journal of Applied Physiology*, 108(3), 670–675.  
582 <https://doi.org/10.1152/jappphysiol.00259.2009>

583 Cook, J. L., & Purdam, C. R. (2014). The challenge of managing tendinopathy in competing athletes.  
584 *British Journal of Sports Medicine*, 48(7), 506 LP – 509. [https://doi.org/10.1136/bjsports-2012-](https://doi.org/10.1136/bjsports-2012-092078)  
585 092078

586 Couppé, C., Svensson, R. B., Josefsen, C. O., Kjeldgaard, E., & Magnusson, S. P. (2020). Ultrasound  
587 speckle tracking of Achilles tendon in individuals with unilateral tendinopathy: a pilot study.  
588 *European Journal of Applied Physiology*, 120(3), 579–589. [https://doi.org/10.1007/s00421-020-](https://doi.org/10.1007/s00421-020-04317-5)  
589 04317-5

590 Craig, C. L., Marshall, A. L., Sjöström, M., Bauman, A. E., Booth, M. L., Ainsworth, B. E., Pratt,  
591 M., Ekelund, U., Yngve, A., Sallis, J. F., & Oja, P. (2003). International physical activity

- 592 questionnaire: 12-Country reliability and validity. *Medicine and Science in Sports and Exercise*,  
593 35(8), 1381–1395. <https://doi.org/10.1249/01.MSS.0000078924.61453.FB>
- 594 De Groote, F., De Laet, T., Jonkers, I., & De Schutter, J. (2008). Kalman smoothing improves the  
595 estimation of joint kinematics and kinetics in marker-based human gait analysis. *Journal of*  
596 *Biomechanics*, 41(16), 3390–3398. <https://doi.org/10.1016/j.jbiomech.2008.09.035>
- 597 De Groote, Friedl, Kinney, A. L., Rao, A. V., & Fregly, B. J. (2016). Evaluation of Direct Collocation  
598 Optimal Control Problem Formulations for Solving the Muscle Redundancy Problem. *Annals of*  
599 *Biomedical Engineering*, 44(10), 2922–2936. <https://doi.org/10.1007/s10439-016-1591-9>
- 600 De Mos, M., Van El, B., Degroot, J., Jahr, H., Van Schie, H. T. M., Van Arkel, E. R., Tol, H.,  
601 Heijboer, R., Van Osch, G. J. V. M., & Verhaar, J. A. N. (2007). Achilles tendinosis: Changes  
602 in biochemical composition and collagen turnover rate. *American Journal of Sports Medicine*,  
603 35(9), 1549–1556. <https://doi.org/10.1177/0363546507301885>
- 604 Delp, S. L., Loan, J. P., Hoy, M. G., Zajac, F. E., Topp, E. L., & Rosen, J. M. (1990). An interactive  
605 graphics-based model of the lower extremity to study orthopaedic surgical procedures. *IEEE*  
606 *Transactions on Biomedical Engineering*, 37(8), 757–767. <https://doi.org/10.1109/10.102791>
- 607 Devaprakash, D., Graham, D. F., Barrett, R. S., Lloyd, D. G., Obst, S. J., Kennedy, B., Adams, K. L.,  
608 Kiely, R. J., Hunter, A., Vlahovich, N., Pease, D. L., Shim, V. B., Besier, T. F., Zheng, M.,  
609 Cook, J. L., & Pizzolato, C. (2022). Free Achilles tendon strain during selected rehabilitation,  
610 locomotor, jumping, and landing tasks. *Journal of Applied Physiology*, 132 (4), 956–965.  
611 <https://doi.org/10.1152/jappphysiol.00662.2021>
- 612 Diniz, P., Quental, C., Violindo, P., Veiga Gomes, J., Pereira, H., Kerkhoffs, G. M. M. J., Ferreira, F.  
613 C., & Folgado, J. (2022). Design and validation of a finite element model of the aponeurotic and  
614 free Achilles tendon. *Journal of Orthopaedic Research*, May 2022, 534–545.  
615 <https://doi.org/10.1002/jor.25408>
- 616 Edama, M., Kubo, M., Onishi, H., Takabayashi, T., Inai, T., Yokoyama, E., Hiroshi, W., Satoshi, N.,  
617 & Kageyama, I. (2015). The twisted structure of the human Achilles tendon. *Scandinavian*  
618 *Journal of Medicine & Science in Sports*, 25(5), e497–e503.  
619 <https://doi.org/https://doi.org/10.1111/sms.12342>
- 620 Farris, D. J., Trewartha, G., McGuigan, M. P., & Lichtwark, G. A. (2013). Differential strain patterns  
621 of the human Achilles tendon determined in vivo with freehand three-dimensional ultrasound  
622 imaging. *Journal of Experimental Biology*, 216(4), 594–600. <https://doi.org/10.1242/jeb.077131>
- 623 Fernandez, J., Zhang, J., Shim, V., Munro, J. T., Sartori, M., Besier, T., Lloyd, D. G., Nickerson, D.  
624 P., & Hunter, P. (2018). Musculoskeletal Modelling and the Physiome Project. In P. Pivonka  
625 (Ed.), *Multiscale Mechanobiology of Bone Remodeling and Adaptation* (pp. 123–174). Springer  
626 International Publishing. [https://doi.org/10.1007/978-3-319-58845-2\\_3](https://doi.org/10.1007/978-3-319-58845-2_3)
- 627 Franz, J. R., Slane, L. C., Rasske, K., & Thelen, D. G. (2015). Non-uniform in vivo deformations of  
628 the human Achilles tendon during walking. *Gait and Posture*, 41(1), 192–197.  
629 <https://doi.org/10.1016/j.gaitpost.2014.10.001>
- 630 Funaro, A., Shim, V., Crouzier, M., Mylle, I., & Vanwanseele, B. (2022). Subject-Specific 3D

- 631 Models to Investigate the Influence of Rehabilitation Exercises and the Twisted Structure on  
632 Achilles Tendon Strains. *Frontiers in Bioengineering and Biotechnology*, 10(July), 1–9.  
633 <https://doi.org/10.3389/fbioe.2022.914137>
- 634 Handsfield, G. G., Inouye, J. M., Slane, L. C., Thelen, D. G., Miller, G. W., & Blemker, S. S. (2017).  
635 A 3D model of the Achilles tendon to determine the mechanisms underlying nonuniform tendon  
636 displacements. *Journal of Biomechanics*, 51, 17–25.  
637 <https://doi.org/10.1016/j.jbiomech.2016.11.062>
- 638 Hansen, W., Shim, V. B., Obst, S., Lloyd, D. G., Newsham-West, R., & Barrett, R. S. (2017).  
639 Achilles tendon stress is more sensitive to subject-specific geometry than subject-specific  
640 material properties: A finite element analysis. *Journal of Biomechanics*, 56, 26–31.  
641 <https://doi.org/10.1016/j.jbiomech.2017.02.031>
- 642 Knaus, K. R., & Blemker, S. S. (2021). 3D Models Reveal the Influence of Achilles Subtendon Twist  
643 on Strain and Energy Storage. *Frontiers in Bioengineering and Biotechnology*, 9(February), 1–  
644 10. <https://doi.org/10.3389/fbioe.2021.539135>
- 645 Komi, P. V., Fukashiro, S., & Järvinen, M. (1992). Biomechanical Loading of Achilles Tendon  
646 During Normal Locomotion. *Clinics in Sports Medicine*, 11(3), 521–531.  
647 [https://doi.org/https://doi.org/10.1016/S0278-5919\(20\)30506-8](https://doi.org/https://doi.org/10.1016/S0278-5919(20)30506-8)
- 648 Lichtwark, G. A., & Wilson, A. M. (2005). In vivo mechanical properties of the human Achilles  
649 tendon during one-legged hopping. *Journal of Experimental Biology*, 208(24), 4715–4725.  
650 <https://doi.org/10.1242/jeb.01950>
- 651 Maas, S. A., Ellis, B. J., Ateshian, G. A., & Weiss, J. A. (2012). FEBio: Finite Elements for  
652 Biomechanics. *Journal of Biomechanical Engineering*, 134(1).  
653 <https://doi.org/10.1115/1.4005694>
- 654 Maffulli, N., Sharma, P., & Luscombe, K. L. (2004). Achilles tendinopathy: aetiology and  
655 management. *Journal of the Royal Society of Medicine.*, 97(10), 472–476.
- 656 Maffulli, Nicola, & Kader, D. (2002). Tendinopathy of tendo achillis. *Journal of Bone and Joint  
657 Surgery - Series B*, 84(1), 1–8. <https://doi.org/10.1302/0301-620X.84B1.12792>
- 658 Maffulli, Nicola, Walley, G., Sayana, M. K., Longo, U. G., & Denaro, V. (2008). Eccentric calf  
659 muscle training in athletic patients with Achilles tendinopathy. *Disability and Rehabilitation*,  
660 30(20–22), 1677–1684. <https://doi.org/10.1080/09638280701786427>
- 661 Maganaris, C. N., Baltzopoulos, V., & Sargeant, A. J. (1998). Changes in Achilles tendon moment  
662 arm from rest to maximum isometric plantarflexion: In vivo observations in man. *Journal of  
663 Physiology*, 510(3), 977 – 985. <https://doi.org/10.1111/j.1469-7793.1998.977bj.x>
- 664 Malliaras, P., Barton, C. J., Reeves, N. D., & Langberg, H. (2013). Achilles and patellar tendinopathy  
665 loading programmes: A systematic review comparing clinical outcomes and identifying  
666 potential mechanisms for effectiveness. *Sports Medicine*, 43(4), 267–286.  
667 <https://doi.org/10.1007/s40279-013-0019-z>
- 668 Mascaró, A., Cos, M. À., Morral, A., Roig, A., Purdam, C., & Cook, J. (2018). Load management in

- 669 tendinopathy: Clinical progression for Achilles and patellar tendinopathy. *Apunts. Medicina de*  
670 *l'Esport*, 53(197), 19–27. <https://doi.org/10.1016/j.apunts.2017.11.005>
- 671 Niesen-Vertommen, S. L., Taunton, J. E., Clement, D. B., & Mosher, R. E. (1992). The effect of  
672 eccentric versus concentric exercise in the management of Achilles tendonitis. *Clinical Journal*  
673 *of Sport Medicine*, 2(2), 109–113. <https://doi.org/10.1097/00042752-199204000-00006>
- 674 Merza, E., Pearson, S., Lichtwark, G., Garofolini, A., & Malliaras, P. (2021). Reliability of Human  
675 Achilles Tendon Stiffness Measures Using Freehand 3-D Ultrasound. *Ultrasound in Medicine &*  
676 *Biology*, 47(4), 973–981. <https://doi.org/https://doi.org/10.1016/j.ultrasmedbio.2021.01.002>
- 677 Mylle, I., Crouzier, M., Hollville, E., Bogaerts, S., & Vanwanseele, B. (2023). Triceps surae muscle  
678 forces during dynamic exercises in patients with Achilles tendinopathy: A cross-sectional study.  
679 *Scandinavian Journal of Medicine and Science in Sports*, November 2022, 1–11.  
680 <https://doi.org/10.1111/sms.14444>
- 681 Nuri, L., Obst, S. J., Newsham-West, R., & Barrett, R. S. (2018). Three-dimensional morphology and  
682 volume of the free Achilles tendon at rest and under load in people with unilateral mid-portion  
683 Achilles tendinopathy. *Experimental Physiology*, 103(3), 358–369.  
684 <https://doi.org/10.1113/EP086673>
- 685 Obst, S. J., Newsham-West, R., & Barrett, R. S. (2016). Changes in Achilles tendon mechanical  
686 properties following eccentric heel drop exercise are specific to the free tendon. *Scandinavian*  
687 *Journal of Medicine and Science in Sports*, 26(4), 421–431. <https://doi.org/10.1111/sms.12466>
- 688 Passini, F. S., Jaeger, P. K., Saab, A. S., Hanlon, S., Chittim, N. A., Arlt, M. J., Ferrari, K. D.,  
689 Haenni, D., Caprara, S., Bollhalder, M., Niederöst, B., Horvath, A. N., Götschi, T., Ma, S.,  
690 Passini-Tall, B., Fucntese, S. F., Blache, U., Silván, U., Weber, B., ... Snedeker, J. G. (2021).  
691 Shear-stress sensing by PIEZO1 regulates tendon stiffness in rodents and influences jumping  
692 performance in humans. *Nature Biomedical Engineering*, 5(12), 1457–1471.  
693 <https://doi.org/10.1038/s41551-021-00716-x>
- 694 Pękala B M, H. P. A., Kopacz, A. O. P., & Tomaszewski, A. M. J. A. W. K. A. (2017). *The twisted*  
695 *structure of the Achilles tendon unraveled : A detailed quantitative and qualitative anatomical*  
696 *investigation. December 2016*, 1–11. <https://doi.org/10.1111/sms.12835>
- 697 Pringels, L., Bossche, L. Vanden, Wezenbeek, E., Burssens, A., Vermue, H., Victor, J., & Chevalier,  
698 A. (2022). *Intratendinous pressure changes in the Achilles tendon during stretching and*  
699 *eccentric loading : Implications for Achilles tendinopathy. March*, 1–12.  
700 <https://doi.org/10.1111/sms.14285>
- 701 Rolf, C., & Movin, T. (1997). Etiology, Histopathology, and Outcome of Surgery in Achillodynia.  
702 *Foot & Ankle International*, 18(9), 565–569. <https://doi.org/10.1177/107110079701800906>
- 703 Shim, V. B., Fernandez, J. W., Gamage, P. B., Regnery, C., Smith, D. W., Gardiner, B. S., Lloyd, D.  
704 G., & Besier, T. F. (2014). Subject-specific finite element analysis to characterize the influence  
705 of geometry and material properties in Achilles tendon rupture. *Journal of Biomechanics*,  
706 47(15), 3598–3604. <https://doi.org/10.1016/j.jbiomech.2014.10.001>
- 707 Shim, V. B., Handsfield, G. G., Fernandez, J. W., Lloyd, D. G., & Besier, T. F. (2018). Combining in

- 708 silico and in vitro experiments to characterize the role of fascicle twist in the Achilles tendon.  
709 *Scientific Reports*, 8(1), 1–12. <https://doi.org/10.1038/s41598-018-31587-z>
- 710 Shim, V. B., Hansen, W., Newsham-West, R., Nuri, L., Obst, S., Pizzolato, C., Lloyd, D. G., &  
711 Barrett, R. S. (2019). Influence of altered geometry and material properties on tissue stress  
712 distribution under load in tendinopathic Achilles tendons – A subject-specific finite element  
713 analysis. *Journal of Biomechanics*, 82, 142-148. <https://doi.org/10.1016/j.jbiomech.2018.10.027>
- 714 Silbernagel, K. G., & Crossley, K. M. (2015). A proposed return-to-sport program for patients with  
715 midportion achilles tendinopathy: Rationale and implementation. *Journal of Orthopaedic and*  
716 *Sports Physical Therapy*, 45(11), 876–886. <https://doi.org/10.2519/jospt.2015.5885>
- 717 Silbernagel, K. G., Thomeé, R., Thomeé, P., & Karlsson, J. (2001). Eccentric overload training for  
718 patients with chronic Achilles tendon pain - A randomised controlled study with reliability  
719 testing of the evaluation methods. *Scandinavian Journal of Medicine and Science in Sports*,  
720 11(4), 197–206. <https://doi.org/10.1034/j.1600-0838.2001.110402.x>
- 721 Sleeswijk Visser, T. S. O., Van Der Vlist, A. C., Van Oosterom, R. F., Van Veldhoven, P., Verhaar,  
722 J. A. N., & De Vos, R. J. (2021). Impact of chronic Achilles tendinopathy on health-related  
723 quality of life, work performance, healthcare utilisation and costs. *BMJ Open Sport and*  
724 *Exercise Medicine*, 7(1), 1–7. <https://doi.org/10.1136/bmjsem-2020-001023>
- 725 Stanish, W. D., Rubinovich, R. M., & Curwin, S. (1986). Eccentric exercise in chronic tendinitis.  
726 *Clinical Orthopaedics and Related Research*, 208, 65–68.  
727 <http://europepmc.org/abstract/MED/3720143>
- 728 Wang, J. H. C. (2006). Mechanobiology of tendon. *Journal of Biomechanics*, 39(9), 1563–1582.  
729 <https://doi.org/10.1016/j.jbiomech.2005.05.011>
- 730 Wang, T., Lin, Z., Ni, M., Thien, C., Day, R. E., Gardiner, B., Rubenson, J., Kirk, T. B., Smith, D.  
731 W., Wang, A., Lloyd, D. G., Wang, Y., Zheng, Q., & Zheng, M. H. (2015). Cyclic mechanical  
732 stimulation rescues achilles tendon from degeneration in a bioreactor system. *Journal of*  
733 *Orthopaedic Research*, 33(12), 1888–1896. <https://doi.org/https://doi.org/10.1002/jor.22960>
- 734 Weiss, J. A., Maker, B. N., & Govindjee, S. (1996). Finite element implementation of  
735 incompressible, transversely isotropic hyperelasticity. *Computer Methods in Applied Mechanics*  
736 *and Engineering*, 135(1–2), 107–128. [https://doi.org/10.1016/0045-7825\(96\)01035-3](https://doi.org/10.1016/0045-7825(96)01035-3)
- 737 Yin, N.-H., Fromme, P., McCarthy, I., & Birch, H. L. (2021). Individual variation in Achilles tendon  
738 morphology and geometry changes susceptibility to injury. *ELife*, 10, e63204.  
739 <https://doi.org/10.7554/eLife.63204>

740
